# Supplementary material
Source: publisher figshare collection journal article supplement (https://plos.figshare.com/articles/dataset/_/8297621)
Supplement: Supplementary file 1 [file 1]

Archive with 5 entries (5 files):
- pone.0218658.s001.docx
- pone.0218658.s002.docx
- pone.0218658.s003.docx
- pone.0218658.s004.pdf
- pone.0218658.s005.pdf
